# Supplementary material
Source: HighWire-hosted journal article supplement (https://ijgc.bmj.com/content/32/10/1283)
Supplement: inline-supplementary-material-2 [file inline-supplementary-material-2.pdf]

## Supplement 2. Excluded articles

**Did not provide information according to histological types**

1. Burghardt E, Girardi F, Lahousen M, Tamussino K, Stettner H. Patterns of pelvic and paraaortic lymph node involvement in ovarian cancer. *Gynecol Oncol*. Feb 1991;40(2):103-6. doi:10.1016/0090-8258(91)90099-q
2. Kanazawa K, Suzuki T, Tokashiki M. The validity and significance of substage IIIC by node involvement in epithelial ovarian cancer: impact of nodal metastasis on patient survival. *Gynecol Oncol*. May 1999;73(2):237-41. doi:10.1006/gyno.1999.5349
3. Pickel H, Lahousen M, Stettner H, Girardi F. The spread of ovarian cancer. *Baillieres Clin Obstet Gynaecol*. Mar 1989;3(1):3-12. doi:10.1016/s0950-3552(89)80036-7
4. Suzuki M, Ohwada M, Yamada T, Kohno T, Sekiguchi I, Sato I. Lymph node metastasis in stage I epithelial ovarian cancer. *Gynecol Oncol*. Nov 2000;79(2):305-8. doi:10.1006/gyno.2000.5951

**Literature review**

1. Lago V, Minig L, Fotopoulou C. Incidence of Lymph Node Metastases in Apparent Early-Stage Low-Grade Epithelial Ovarian Cancer: A Comprehensive Review. *Int J Gynecol Cancer*. Oct 2016;26(8):1407-14. doi:10.1097/igc.0000000000000787

**Did not include low-grade tumors**

1. Timmers PJ, Zwinderman K, Coens C, Vergote I, Trimbos JB. Lymph node sampling and taking of blind biopsies are important elements of the surgical staging of early ovarian cancer. *Int J Gynecol Cancer*. Oct 2010;20(7):1142-7. doi:10.1111/igc.0b013e3181ef8e03
2. Bizzarri N, du Bois A, Fruscio R, et al. Is there any therapeutic role of pelvic and para-aortic lymphadenectomy in apparent early stage epithelial ovarian cancer? *Gynecologic Oncology*. 2021;160(1):56-63.
3. Brockbank EC, Harry V, Kolomainen D, et al. Laparoscopic staging for apparent early stage ovarian or fallopian tube cancer. First case series from a UK cancer centre and systematic literature review. *Eur J Surg Oncol*. Aug 2013;39(8):912-7. doi:10.1016/j.ejso.2013.05.007
4. Knipscheer RJ. Para-aortal lymph nodes dissection in 20 cases of primary epithelial ovary carcinoma stage I (Figo): influence on staging. *Eur J Obstet Gynecol Reprod Biol*. Aug 1982;13(5):303-7. doi:10.1016/0028-2243(82)90053-3

**Did not provide separate information for early-stage low-grade serous tumors**

1. Bacalbasa N, Balescu I, Vilcu M, et al. The Risk of Para-Aortic Lymph Node Metastases in Apparent Early Stage Ovarian Cancer. *Medicina (Kaunas)*. Mar 3 2020;56(3)doi:10.3390/medicina56030108
2. Baiocchi, Raspagliesi, Grosso, Fontanelli, Cobellis, Re D. Early ovarian cancer: Is there a role for systematic pelvic and para-aortic lymphadenectomy? *International Journal of Gynecological Cancer*. 1998;8(2):103-108. doi:<https://doi.org/10.1046/j.1525-1438.1998.09758.x>
3. Benedetti-Panici P, Greggi S, Maneschi F, et al. Anatomical and pathological study of retroperitoneal nodes in epithelial ovarian cancer. *Gynecol Oncol*. Nov 1993;51(2):150-4. doi:10.1006/gyno.1993.1263
4. Cass I, Li AJ, Runowicz CD, et al. Pattern of lymph node metastases in clinically unilateral stage I invasive epithelial ovarian carcinomas. *Gynecol Oncol*. Jan 2001;80(1):56-61. doi:10.1006/gyno.2000.6027
5. Chan JK, Munro EG, Cheung MK, et al. Association of lymphadenectomy and survival in stage I ovarian cancer patients. *Obstet Gynecol*. Jan 2007;109(1):12-9. doi:10.1097/01.AOG.0000249610.95885.ef
6. Chang SJ, Bristow RE, Ryu HS. Analysis of para-aortic lymphadenectomy up to the level of the renal vessels in apparent early-stage ovarian cancer. *J Gynecol Oncol*. Jan 2013;24(1):29-36. doi:10.3802/jgo.2013.24.1.29
7. Deng T, Huang Q, Wan T, et al. The impact of lymph node dissection on survival in patients with clinical early-stage ovarian cancer. *J Gynecol Oncol*. May 2021;32(3):e40. doi:10.3802/jgo.2021.32.e40
8. Desteli GA, Gultekin M, Usubutun A, Yuce K, Ayhan A. Lymph node metastasis in grossly apparent clinical stage Ia epithelial ovarian cancer: Hacettepe experience and review of literature. *World J Surg Oncol*. Nov 30 2010;8:106. doi:10.1186/1477-7819-8-106
9. Garcia-Soto AE, Boren T, Wingo SN, Heffernan T, Miller DS. Is comprehensive surgical staging needed for thorough evaluation of early-stage ovarian carcinoma? *Am J Obstet Gynecol*. Mar 2012;206(3):242.e1-5. doi:10.1016/j.ajog.2011.08.022
10. Grabowski JP, Glajzer J, Richter R, et al. Lymphovascular space invasion and Ki67 as predictors of lymph node metastasis in primary low grade serous ovarian cancer. *Int J Gynecol Cancer*. Jan 2021;31(1):98-103. doi:10.1136/ijgc-2020-001950
11. Harter P, Gnauert K, Hils R, et al. Pattern and clinical predictors of lymph node metastases in epithelial ovarian cancer. *Int J Gynecol Cancer*. Nov-Dec 2007;17(6):1238-44. doi:10.1111/j.1525-1438.2007.00931.x
12. Lee CL, Kusunoki S, Huang CY, Wu KY, Lee PS, Huang KG. Surgical and survival outcomes of laparoscopic staging surgery for patients with stage I ovarian cancer. *Taiwan J Obstet Gynecol*. Feb 2018;57(1):7-12. doi:10.1016/j.tjog.2017.12.002

13. Lepinay K, Szubert S, Lewandowska A, et al. The association between lymph node metastases and long-term survival in patients with epithelial ovarian cancer. *Contemp Oncol (Pozn)*. 2020;24(3):163-171. doi:10.5114/wo.2020.99029
14. Li X, Xing H, Li L, et al. Clinical significance of para-aortic lymph node dissection and prognosis in ovarian cancer. *Front Med*. Mar 2014;8(1):96-100. doi:10.1007/s11684-014-0316-4
15. Maggioni A, Benedetti Panici P, Dell'Anna T, et al. Randomised study of systematic lymphadenectomy in patients with epithelial ovarian cancer macroscopically confined to the pelvis. *Br J Cancer*. Sep 18 2006;95(6):699-704. doi:10.1038/sj.bjc.6603323
16. Mattes MD, Lee JC, Metzger DJ, Ashamalla H, Katsoulakis E. The incidence of pelvic and para-aortic lymph node metastasis in uterine papillary serous and clear cell carcinoma according to the SEER registry. *J Gynecol Oncol*. Jan 2015;26(1):19-24. doi:10.3802/jgo.2015.26.1.19
17. Morice P, Joulie F, Camatte S, et al. Lymph node involvement in epithelial ovarian cancer: analysis of 276 pelvic and paraaortic lymphadenectomies and surgical implications. *J Am Coll Surg*. Aug 2003;197(2):198-205. doi:10.1016/s1072-7515(03)00234-5
18. Nomura H, Tsuda H, Susumu N, et al. Lymph node metastasis in grossly apparent stages I and II epithelial ovarian cancer. *Int J Gynecol Cancer*. Apr 2010;20(3):341-5. doi:10.1111/IGC.0b013e3181cf6271
19. Onda T, Yoshikawa H, Yokota H, Yasugi T, Taketani Y. Assessment of metastases to aortic and pelvic lymph nodes in epithelial ovarian carcinoma. A proposal for essential sites for lymph node biopsy. *Cancer*. Aug 15 1996;78(4):803-8. doi:10.1002/(sici)1097-0142(19960815)78:4<803::aid-cnrcr17>3.0.co;2-z
20. Oshita T, Itamochi H, Nishimura R, et al. Clinical impact of systematic pelvic and para-aortic lymphadenectomy for pT1 and pT2 ovarian cancer: a retrospective survey by the Sankai Gynecology Study Group. *Int J Clin Oncol*. Dec 2013;18(6):1107-13. doi:10.1007/s10147-012-0483-8
21. Petru E, Lahousen M, Tamussino K, et al. Lymphadenectomy in stage I ovarian cancer. *Am J Obstet Gynecol*. Feb 1994;170(2):656-62. doi:10.1016/s0002-9378(94)70244-6
22. Powless CA, Aletti GD, Bakkum-Gamez JN, Cliby WA. Risk factors for lymph node metastasis in apparent early-stage epithelial ovarian cancer: implications for surgical staging. *Gynecol Oncol*. Sep 2011;122(3):536-40. doi:10.1016/j.ygyno.2011.05.001
23. Svolgaard O, Lidegaard O, Nielsen ML, et al. Lymphadenectomy in surgical stage I epithelial ovarian cancer. *Acta Obstet Gynecol Scand*. Mar 2014;93(3):256-60. doi:10.1111/aogs.12322

24. Ulker V, Kuru O, Numanoglu C, Akbayır O, Polat I, Uhri M. Lymph node metastasis in patients with epithelial ovarian cancer macroscopically confined to the ovary: review of a single-institution experience. *Arch Gynecol Obstet*. May 2014;289(5):1087-92. doi:10.1007/s00404-013-3078-3
25. Zhou J, Sun JY, Wu SG, et al. Risk factors for lymph node metastasis in ovarian cancer: Implications for systematic lymphadenectomy. *Int J Surg*. May 2016;29:123-7. doi:10.1016/j.ijsu.2016.03.039
26. Erdem B, Yüksel IT, Peker N, et al. Evaluation of Factors Affecting Lymph Node Metastasis in Clinical Stage I-II Epithelial Ovarian Cancer. *Oncol Res Treat*. 2018;41(7-8):444-448. doi:10.1159/000488082
27. Haller H, Mamula O, Krasevic M, et al. Frequency and distribution of lymph node metastases in epithelial ovarian cancer. *Int J Gynecol Cancer*. Feb 2011;21(2):245-50.
28. Fournier M, Stoeckle E, Guyon F, et al. Lymph node involvement in epithelial ovarian cancer: sites and risk factors in a series of 355 patients. *Int J Gynecol Cancer*. Nov 2009;19(8):1307-13. doi:10.1111/IGC.0b013e3181b8a07c
29. Signorelli M, Guerra L, Pirovano C, et al. Detection of nodal metastases by 18F-FDG PET/CT in apparent early stage ovarian cancer: a prospective study. *Gynecol Oncol*. Nov 2013;131(2):395-9. doi:10.1016/j.ygyno.2013.08.022
30. Bachmann C, Krämer B, Brucker SY, et al. Relevance of pelvic and para-aortic node metastases in early-stage ovarian cancer. *Anticancer Res*. Nov 2014;34(11):6735-8.
31. Ditto A, Martinelli F, Reato C, et al. Systematic para-aortic and pelvic lymphadenectomy in early stage epithelial ovarian cancer: a prospective study. *Ann Surg Oncol*. Nov 2012;19(12):3849-55. doi:10.1245/s10434-012-2439-7
32. Faught W, Le T, Fung Kee Fung M, Krepart G, Lotocki R, Heywood M. Early ovarian cancer: what is the staging impact of retroperitoneal node sampling? *J Obstet Gynaecol Can*. Jan 2003;25(1):18-21. doi:10.1016/s1701-2163(16)31078-7
33. Baiomy TA, OHK, WMA, et al. Ovarian Cancer Surgical Staging, Laparoscopy Versus Laparotomy: A Comparative Study. *Journal of Gynecologic Surgery*. 2020;36(4):179-183. doi:10.1089/gyn.2019.0109
34. Hengeveld EM, Zusterzeel PLM, Lajer H, Høgdall CK, Rosendahl M. The value of surgical staging in patients with apparent early stage epithelial ovarian carcinoma. *Gynecol Oncol*. Aug 2019;154(2):308-313. doi:10.1016/j.ygyno.2019.06.006
35. Matsuo K, Wong KK, Fotopoulou C, et al. Impact of lympho-vascular space invasion on tumor characteristics and survival outcome of women with low-grade serous ovarian carcinoma. *Journal of surgical oncology*. 2018;117(2):236-244.

36. Khouly NI, Elkelani OA, Elhalaby AF. Lymph node involvement in clinically apparent early ovarian cancer: a prospective study. *Eur J Gynaecol Oncol.* 2017;38(2):232-235.
37. Brown JV, Mendivil AA, Abaid LN, et al. The safety and feasibility of robotic-assisted lymph node staging in early-stage ovarian cancer. *Int J Gynecol Cancer.* Oct 2014;24(8):1493-8. doi:10.1097/IGC.0000000000000224
38. Ercelep O, Ozcelik M, Gumus M. Association of lymphadenectomy and survival in epithelial ovarian cancer. *Curr Probl Cancer.* 04 2019;43(2):151-159. doi:10.1016/j.currprobcancer.2018.08.002
39. Wang J, Li J, Chen R, Lu X. Survival effect of different lymph node staging methods on ovarian cancer: An analysis of 10 878 patients. *Cancer Med.* Sep 2018;7(9):4315-4329. doi:10.1002/cam4.1680
40. Di Re F, Fontanelli R, Raspagliesi F, Di Re E. Pelvic and para-aortic lymphadenectomy in cancer of the ovary. *Baillieres Clin Obstet Gynaecol.* Mar 1989;3(1):131-42. doi:10.1016/s0950-3552(89)80048-3
41. Chen SS, Lee L. Incidence of para-aortic and pelvic lymph node metastases in epithelial carcinoma of the ovary. *Gynecol Oncol.* Aug 1983;16(1):95-100. doi:10.1016/0090-8258(83)90013-6
42. Díaz-Feijoo B, Bebia V, Hernández A, et al. Surgical complications comparing extraperitoneal vs transperitoneal laparoscopic aortic staging in early stage ovarian and endometrial cancer. *Gynecol Oncol.* Jan 2021;160(1):83-90. doi:10.1016/j.ygyno.2020.10.038
